# Supplementary material for: A Highly Sensitive and Selective ppb-Level Acetone Sensor Based on a Pt-Doped 3D Porous SnO2 Hierarchical Structure
Source: PubMed Central journal article supplement (PMC7070610; doi:10.3390/s20041150), 2020-02-19
Supplement: sensors-20-01150-s001.pdf [file sensors-20-01150-s001.pdf]

## **Support Information**

**A highly sensitive and selective ppb-level acetone sensor based on a**

**Pt-doped 3D porous SnO<sub>2</sub> hierarchical structure**

Wenjing Quan, Xuefeng Hu, Xinjie Min, Junwen Qiu, Renbin Tian, Peng Ji, Weiwei Qin, Haixin Wang, Ting Pan, Suishi Cheng, Xiaoqiang Chen, Wei Zhang, Xiaorong Wang, and Hua Zheng

**Figure S1**

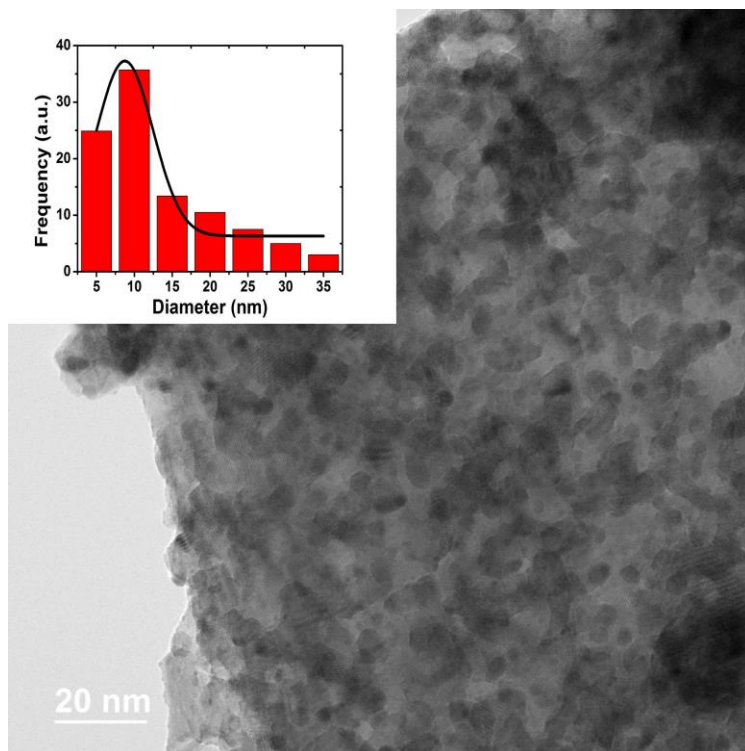

Figure S1. The size distribution of nanoparticles.

Figure S2

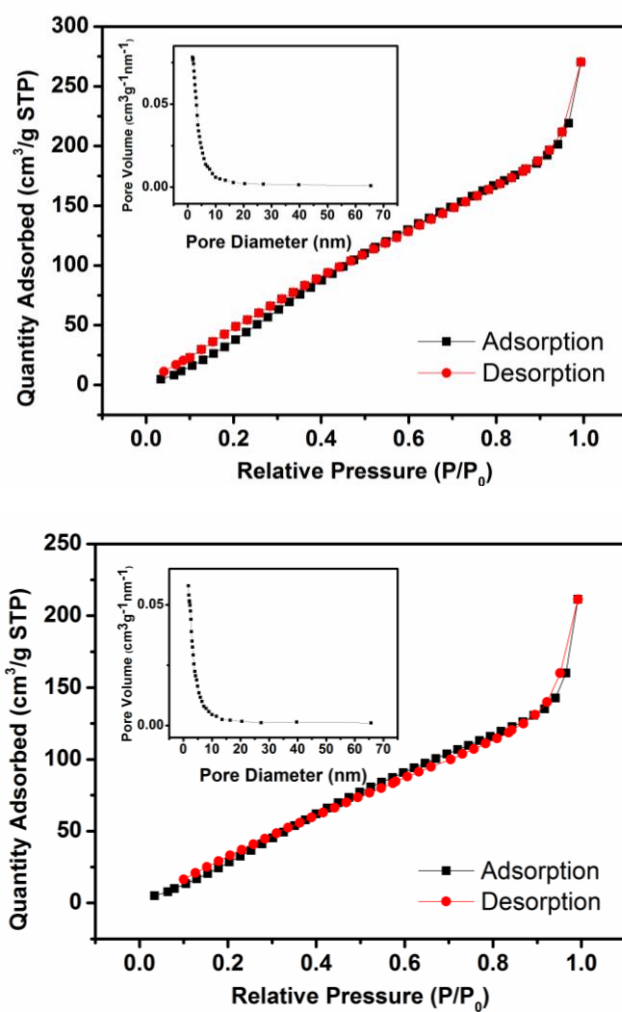

Figure S2. Nitrogen adsorption-desorption isotherms of pure SnO<sub>2</sub> and Pt-doped 3DS.

### Growth of Pt-doped 3D Porous SnO<sub>2</sub>

Based on the experimental observations and analysis, a possible growth mechanism of the hierarchical Pt-doped SnO<sub>2</sub> nanoflowers is proposed in Figure S3. A step-by-step reaction is listed in equations (1)-(4). The precursor Sn(OH)<sub>4</sub><sup>2-</sup> and Pt(OH)<sub>6</sub><sup>2-</sup> anions are formed from the Sn<sup>2+</sup> ion of SnCl<sub>2</sub>·2H<sub>2</sub>O, the PtCl<sub>6</sub><sup>2-</sup> ion of H<sub>2</sub>PtCl<sub>6</sub> and the excess OH<sup>-</sup> ions of NaOH, according to reactions (1) and (2). Salicylic acid can be used a chelating agent and easily bonds to form a stable complex compound with Sn(OH)<sub>4</sub><sup>2-</sup> in the solvent. The selective coordination of salicylic acid leads to the anisotropic growth of the SnO<sub>2</sub> crystals, which hinders the rapid formation of different orientations of nanosheets and thus facilitates the self-assembly of the nuclei into SnO<sub>2</sub> nanosheets to form SnO<sub>2</sub> nanoflowers. As the reaction proceeds, the reactions occur during the hydrothermal process according to reactions (3) and (4).

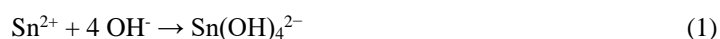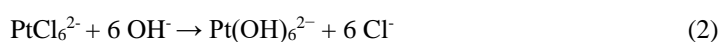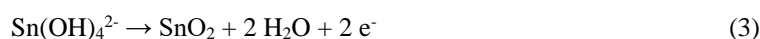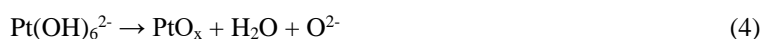

Multiple pores form on the petals by postannealing the sample at 700°C. The thermal decomposition of the organic impurity (salicylic acid) and the release of gas into the confined space during the sintering process help to generate the porous structure.

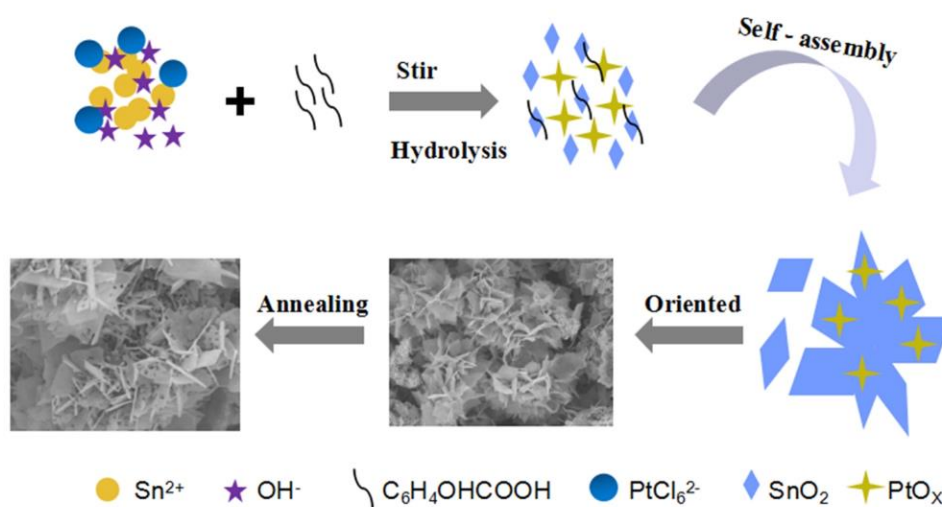

**Figure S3.** A possible evolution process of the SnO<sub>2</sub> nanoflowers.
